# Supplementary material for: Innovative Bioactive Nanofibrous Materials Combining Medicinal and Aromatic Plant Extracts and Electrospinning Method
Source: MDPI journal article supplement (doi:10.3390/membranes13100840), 2023-10-21
Supplement: s1 [file s1]

**Supplementary material**  
**Manuscript ID: membranes-2665346**

**Table S1.** The benefits of some plant extracts for health.

| Plant                           | Part of plant                    | Beneficial properties                                                                                                                                                                                                                                        | Reference               |
|---------------------------------|----------------------------------|--------------------------------------------------------------------------------------------------------------------------------------------------------------------------------------------------------------------------------------------------------------|-------------------------|
| <i>Achyrocline satureioides</i> | Aerial                           | respiratory diseases, arthritis, stomach pain, to treat gastritis and ulcer, as antipyretic, wound healing, cholesterol lowering                                                                                                                             | [132]<br>[133]<br>[134] |
| <i>Eupatorium viscidum</i>      | Aerial                           | acetylcholinesterase inhibition, modification of monoamines, antiamyloid aggregation effect and antioxidant activity                                                                                                                                         | [135]                   |
| <i>Ruprechtia apetala</i>       | Aerial                           | inhibition of tyrosinase monophenolase activity                                                                                                                                                                                                              | [136]                   |
| <i>Trichocline reptans</i>      | Aerial                           | cholinesterase inhibition                                                                                                                                                                                                                                    | [137]                   |
| <i>Zanthoxylum coco</i>         | Aerial                           | cholinesterase inhibition                                                                                                                                                                                                                                    | [137]                   |
| <i>Poncirus trifoliata</i>      | Fruit                            | mitigate allergic reactions, inflammation, edema, digestive complications, respiratory problems, spleen-related problems, liver complications, neuronal pain, hyperlipidemia, rheumatoid arthritis, cardiovascular problems, hernia, sinusitis, and insomnia | [138]                   |
| <i>Treculia obovoidea</i>       | Twigs                            | antimicrobial activity                                                                                                                                                                                                                                       | [139]                   |
| <i>Angelica archangelica</i>    | Leaves and root                  | antioxidant activity, for digestive disorders, to enhance blood circulation                                                                                                                                                                                  | [140,141]               |
| <i>Cassia obtusifolia</i>       | Seed                             | neuroprotection, hepatoprotective effect, antimicrobial activity                                                                                                                                                                                             | [142,143,144]           |
| <i>Desmodium gangeticum</i>     | Root and leaf                    | tonics, febrifuge, digestive, antiemetic, astringent, anti-asthmatic, antidiarrhoeal and anti-inflammatory                                                                                                                                                   | [145, 146]              |
| <i>Salvia officinalis</i>       | Flowers, leaves                  | relief of pain, protecting the body against oxidative stress, free radical damages, angiogenesis, inflammation, bacterial and virus infection, anticancer and antiviral                                                                                      | [147, 148]              |
| <i>Moringa oleifera</i>         | Leaves, seeds, roots and flowers | antioxidant activity, wound healing                                                                                                                                                                                                                          | [149, 150, 151]         |

|                                |                                        |                                                                                                                                                                                                                                                                                                                |            |
|--------------------------------|----------------------------------------|----------------------------------------------------------------------------------------------------------------------------------------------------------------------------------------------------------------------------------------------------------------------------------------------------------------|------------|
| <i>Ginkgo biloba</i>           | Leaves                                 | neuroprotective, anticancer, cardioprotective, stress alleviating, and memory enhancing effects                                                                                                                                                                                                                | [152]      |
| <i>Lavandula angustifolia</i>  | Flowers, buds and leaves               | sedative and analgesic properties, prevention of Alzheimer's disease, anticancer                                                                                                                                                                                                                               | [153]      |
| <i>Prunus armeniaca</i> L      | Fruit and seed                         | anticancer, gynecological diseases, rheumatic pain, headache, and skin hyperpigmentation, for skin diseases, ear inflammation, and tinnitus; treat asthma, productive cough, and fever                                                                                                                         | [154, 155] |
| <i>Astragalus membranaceus</i> | Root                                   | anti-inflammatory, anticancer                                                                                                                                                                                                                                                                                  | [156]      |
| <i>Cordyceps sinensis</i>      | Fungus                                 | increase longevity, anticancer, antioxidant properties, anti-diabetic, antiasthma, for treatment of cough and cold                                                                                                                                                                                             | [157]      |
| <i>Abelmoschus manihot</i>     | Flowers, seeds, stems, and leaves      | treatment of chronic kidney disease, antidiabetic nephropathy, antioxidant, antiadipogenic, anti-inflammatory, analgesic, anticonvulsant, antidepressant, antiviral, antitumor, cardioprotective, antiplatelet, neuroprotective, immunomodulatory, and hepatoprotective activities                             | [158]      |
| <i>Vitis vinifera</i>          | Fruits, seeds, stems, skin and pomaces | chemoprotective properties against free radicals and oxidative stress, anti-inflammatory activity, and anticarcinogenic properties                                                                                                                                                                             | [159]      |
| <i>Zingiber officinale</i>     | Root                                   | antioxidant, anti-inflammatory, antimicrobial, and anticancer activities; for prevention of neurodegenerative diseases, cardiovascular diseases, obesity, diabetes mellitus, chemotherapy-induced nausea and emesis, for respiratory disorders                                                                 | [160]      |
| <i>Garcinia lucida</i>         | Barks                                  | chronic kidney disease and cardiovascular diseases treatment                                                                                                                                                                                                                                                   | [161]      |
| <i>Portulaca oleracea</i>      | Leaves                                 | antioxidant activity, prevent cardiovascular disease and cancer, reducing atherosclerosis and inflammatory markers in the body, decelerate the progression of Parkinson's disease, improvement of blood lipid and glucose levels, treatment of diabetes and utilized as an anti-bacterial and anti-viral agent | [162]      |
| <i>Melissa Officinalis</i>     | Aerial                                 | for treatment of gastrointestinal, cardiovascular, neurological, psychological disorders; antioxidant, anti-inflammatory,                                                                                                                                                                                      | [163]      |

|                               |        |                                                                                                                                                                                                                             |       |
|-------------------------------|--------|-----------------------------------------------------------------------------------------------------------------------------------------------------------------------------------------------------------------------------|-------|
|                               |        | antispasmodic, antimicrobial, neuroprotective, nephroprotective, antinociceptive effects                                                                                                                                    |       |
| <i>Curcuma longa</i>          | Roots  | for treatment of liver obstruction and jaundice, for ulcers and inflammation; cough, cold, dental issues, indigestion, skin infections, blood purification, asthma, piles, bronchitis, tumor, wounds, and hepatic disorders | [164] |
| <i>Calendula officinalis</i>  | Aerial | anti-inflammatory, anti-cancer, antihelminthic, antidiabetes, wound healing, hepatoprotective, and antioxidant activities                                                                                                   | [165] |
| <i>Rosmarinus officinalis</i> | Aerial | antitumor, anti-inflammatory, analgesic, neurodegenerative, endocrinal, anti-infective and antioxidant; treat minor wounds, rashes, headache, dyspepsia, circulation problems                                               | [166] |
| <i>Achyranthes aspera</i>     | Aerial | antiperiodic, diuretic, purgative, laxative antiasthmatic, hepatoprotective, anti-allergi; for treatment of pneumonia, diarrhea, dysentery, asthma, cough, dropsy, ulcers, piles, rheumatism, and skin diseases             | [167] |
| <i>Punica granatum</i>        | Fruits | anti-inflammatory, antioxidant and antibacterial activities; inhibitory effect on skin and breast cancers                                                                                                                   | [168] |
